# Supplementary material
Source: publisher site journal article supplement (https://www.dovepress.com/article/325443)
Supplement: Supplementary file 1 [file get_supplementary_file.php]

**[Supplemental Methods](javascript:;)**

*Lentivirus-based shRNA and expression vector*

Wild type TP53 fragment was amplified from the cDNAs of normal lung tissue with primers containing XbaI and BamHI cutting sites and tagged with FLAG at C-terminus. TCTAGAGCCACCATGGAGGAGCCGCAGTCAGATCC and GGATCCTCACTTATCGTCGTCATCCTTGTAATCGTCTGAGTCAGGCCCTTCTGTC. The fragment was then ligated into pGEM-T easy (Promega) to generate pGEM-T-TP53. TP53 Mutant p53 G245S were generated by site-directed mutagenesis according to Agilent QuikChange® protocol. In brief, mutagenic primers were designed using Agilent QuikChange on-line tool, PCR was performed with pGEM-T-TP53 as a template using mutagenic primers. Cctccggttcatgctgcccatgcaggaac and gttcctgcatgggcagcatgaaccggagg to generate a lentiviral expression vector, pGEM-T-TP53 and pGEM-T-TP53 mutant were digested with XbaI and BamHI, The purified fragments of WT and TP53 mutant were inserted into lentiviral expression vector pCDH-CMV-MCS-EF1-GFP-Puro (System Biosciences). The sequence of each construct was confirmed by Sanger sequencing.

*Lentivirus particle packaging and transduction*

To generate the lentiviral particles, lentiviral-based expression vector, along with packaging vectors psPAX2 and pMD2.G, were transiently transfected into human embryonic kidney cell 293T using the lipofectamine 2000 transfection reagent (Life techonlogies, USA). The lentiviruses were transduced into H3122 cells in the presence of polybrene (8μg/ml).

[**Supplemental Figures**](javascript:;)

**Figure S1.** KEGG pathway mapping.


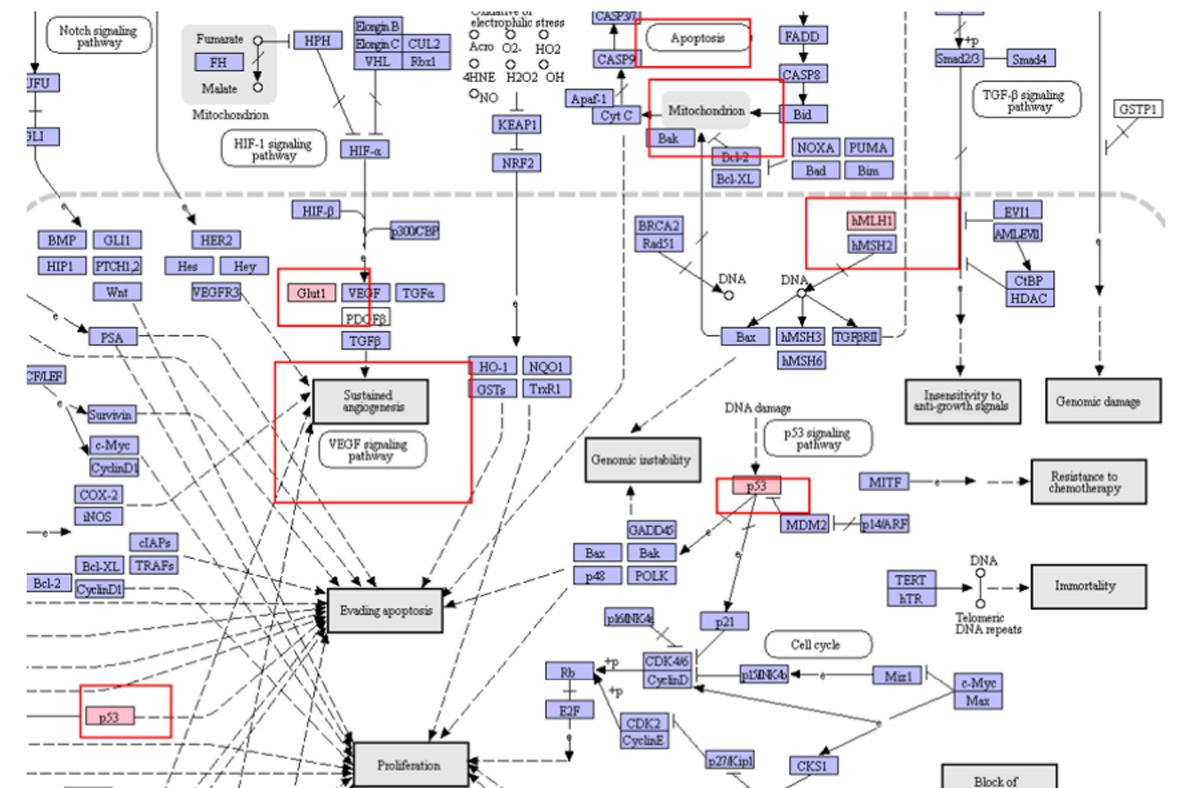


**Figure S2.** Protein analysis in the STRING database.


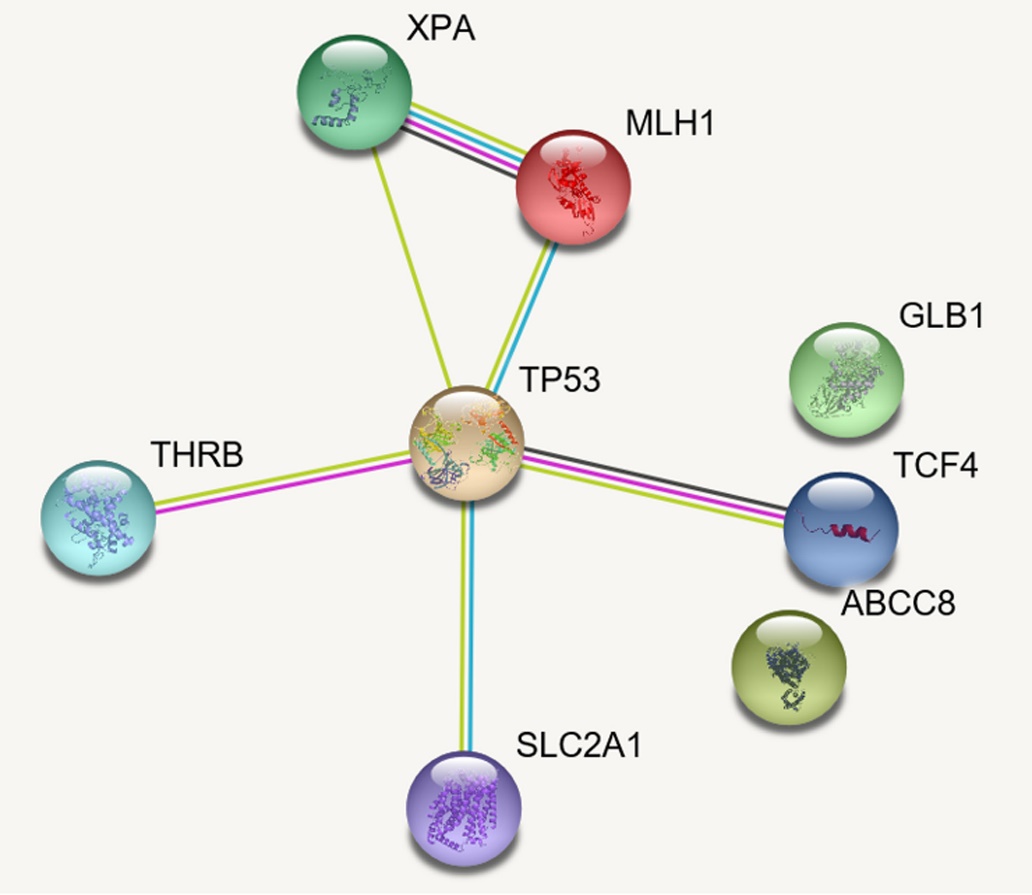


[**Supplemental Tables**](javascript:;)

Table S1. Clinical characteristics of enrolled patients for WES (n=10)

| Patient | extreme strong response to crizotinib | | | | | extreme poor response to crizotinib | | | | |
| --- | --- | --- | --- | --- | --- | --- | --- | --- | --- | --- |
| number | 1 | 2 | 3 | 4 | 5 | 6 | 7 | 8 | 9 | 10 |
| sex | M | F | F | F | F | M | M | F | M | M |
| age (years) | 61 | 59 | 39 | 52 | 46 | 56 | 81 | 46 | 32 | 62 |
| pathology | AD | AD | AD | AD | AD | AD | AD | AD | AD | AD |
| BM | no | yes | no | no | no | yes | no | no | no | no |
| ORR | PR | PR | PR | PR | PR | PD | SD | SD | PD | SD |
| PFS (months) | 53 | ***26a*** | 48 | ***30a*** | 36 | 1 | 2 | 5 | 3 | 3 |
| OS (months) | 53 | ***37b*** | 48 | 52 | 36 | 3 | 2 | 11 | 4 | 7 |
| TMB | 6 | 7 | 10 | 9 | 8 | 11 | 23 | 17 | 18 | 22 |

F: female; M: male; AD: adenocarcinoma; BM: brain metastasis; ORR: overall response; PR: partial response; SD: stable disease; PD: progression disease; PFS: progression-free survival; OS: overall survival; a: crizotinib resistance occurred in number 2 and 4patient; b: only death in number 2 patient who didn’t receive any treatment after crizotinib resistance; TMB: tumor mutation burden

**Table S2**. Related 43 gene variations in tumor growth or drug responsiveness.

| Chr | Start | End | Ref | Alt | Func | Gene | ExonicFunc.ref Gene |
| --- | --- | --- | --- | --- | --- | --- | --- |
| chr1 | 12062090 | 12062090 | C | T | exonic | MFN2 | nonsynonymous SNV |
| chr1 | 43394913 | 43394913 | C | T | exonic | SLC2A1 | nonsynonymous SNV |
| chr1 | 55318019 | 55318019 | C | T | exonic | DHCR24 | nonsynonymous SNV |
| chr2 | 27589697 | 27589697 | G | A | exonic | EIF2B4 | nonsynonymous SNV |
| chr3 | 24185030 | 24185030 | C | T | exonic | THRB | nonsynonymous SNV |
| chr3 | 33114079 | 33114079 | G | A | exonic | GLB1 | nonsynonymous SNV |
| chr3 | 37035043 | 37035043 | C | T | exonic | MLH1 | nonsynonymous SNV |
| chr3 | 37067281 | 37067281 | C | T | exonic | MLH1 | stopgain |
| chr3 | 38647549 | 38647549 | C | T | exonic | SCN5A | nonsynonymous SNV |
| chr3 | 98299553 | 98299553 | G | A | exonic | CPOX | nonsynonymous SNV |
| chr3 | 129247749 | 129247749 | C | T | exonic | RHO | nonsynonymous SNV |
| chr3 | 148896379 | 148896379 | G | A | exonic | CP | stopgain |
| chr4 | 6304112 | 6304112 | G | A | exonic | WFS1 | nonsynonymous SNV |
| chr5 | 112399807 | 112399807 | C | T | exonic | MCC | nonsynonymous SNV |
| chr6 | 6266848 | 6266848 | G | A | exonic | F13A1 | stopgain |
| chr6 | 49426902 | 49426902 | C | T | exonic | MUT | nonsynonymous SNV |
| chr6 | 74354306 | 74354306 | G | A | exonic | SLC17A5 | nonsynonymous SNV |
| chr7 | 100228596 | 100228596 | G | A | exonic | TFR2 | stopgain |
| chr7 | 107350571 | 107350571 | C | T | exonic | SLC26A4 | nonsynonymous SNV |
| chr7 | 150671915 | 150671915 | C | T | exonic | KCNH2 | nonsynonymous SNV |
| chr8 | 38003586 | 38003586 | C | T | exonic | STAR | nonsynonymous SNV |
| chr9 | 95481404 | 95481404 | T | G | exonic | BICD2 | nonsynonymous SNV |
| chr9 | 100447259 | 100447259 | G | A | exonic | XPA | stopgain |
| chr9 | 116151801 | 116151801 | G | A | exonic | ALAD | nonsynonymous SNV |
| chr11 | 17417206 | 17417206 | G | A | exonic | ABCC8 | nonsynonymous SNV |
| chr11 | 46898045 | 46898045 | G | A | exonic | LRP4 | nonsynonymous SNV |
| chr11 | 68171075 | 68171075 | G | A | exonic | LRP5 | nonsynonymous SNV |
| chr11 | 76885871 | 76885871 | C | T | exonic | MYO7A | stopgain |
| chr14 | 23885871 | 23885871 | C | T | exonic | MYH7 | nonsynonymous SNV |
| chr14 | 23887522 | 23887522 | C | T | exonic | MYH7 | nonsynonymous SNV |
| chr14 | 69346747 | 69346747 | G | A | exonic | ACTN1 | nonsynonymous SNV |
| chr15 | 80472526 | 80472526 | C | T | exonic | FAH | nonsynonymous SNV |
| chr17 | 7577548 | 7577548 | C | T | exonic | TP53 | nonsynonymous SNV |
| chr18 | 52896219 | 52896219 | G | A | exonic | TCF4 | nonsynonymous SNV |
| chr21 | 35821910 | 35821910 | G | A | exonic | KCNE1 | nonsynonymous SNV |
| chr22 | 40760969 | 40760969 | G | A | exonic | ADSL | nonsynonymous SNV |
| chr22 | 42525035 | 42525035 | C | T | exonic | CYP2D6 | nonsynonymous SNV |
| chrX | 153001686 | 153001686 | G | A | exonic | ABCD1 | nonsynonymous SNV |
| chrX | 154001427 | 154001427 | C | T | exonic | DKC1 | nonsynonymous SNV |
| chr2 | 47703631 | 47703631 | C | T | exonic | MSH2 | stopgain |
| chr2 | 47635629 | 47635629 | G | T | exonic | MSH2 | stopgain |
| chr2 | 47641557 | 47641557 | G | A | exonic | MSH2 | nonsynonymous SNV |
| chr2 | 47657020 | 47657020 | C | T | exonic | MSH2 | stopgain |
